# Supplementary material for: Genetic analysis identifies potential transmission of low pathogenic avian influenza viruses between poultry farms
Source: PubMed Central journal article supplement (PMC6850361; doi:10.1111/tbed.13199), 2019-04-25
Supplement: TBED-66-1653-s001.pdf [file TBED-66-1653-s001.pdf]

**S1 Table. Viruses isolated from potential between-farm transmission cases.** Detailed information on low pathogenic avian influenza (LPAI) viruses isolated from potential between-farm transmission cases. All viruses were detected as part of the national avian influenza (AI) surveillance program in the Netherlands between January 2006 and September 2016. Whole genome consensus sequences were submitted to the GISAID's EpiFlu™ Database (<https://www.gisaid.org>).

| Potential case | Isolate number and name                        | Poultry type          | No. of animals per farm | Farm culled | Passage details | Collection location (province) | Collection date | GISAID isolate ID |
|----------------|------------------------------------------------|-----------------------|-------------------------|-------------|-----------------|--------------------------------|-----------------|-------------------|
| H1N5-2007      | 1. A/Turkey/Netherlands/07014290/2007          | Turkey                | n/a                     | No          | E2              | Limburg                        | 2007-05-31      | EPI_ISL_309820    |
|                | 2. A/Turkey/Netherlands/07016245/2007          | Turkey                | 19,000                  | No          | E1              | Limburg                        | 2007-06-22      | EPI_ISL_309821    |
| H10N7-2009     | 1. A/Turkey/Netherlands/09006938/2009          | Turkey                | 11,500                  | No          | E1              | Noord-Brabant                  | 2009-04-14      | EPI_ISL_309822    |
|                | 2. A/Chicken/Netherlands/09006942/2009         | Outdoor layer chicken | 8,500                   | No          | E1              | Noord-Brabant                  | 2009-04-15      | EPI_ISL_309798    |
| H6N1-2010      | 1. A/Chicken/Netherlands/10010413/2010         | Indoor layer chicken  | 25,500                  | No          | E1              | Friesland                      | 2010-06-21      | EPI_ISL_309801    |
|                | 2. A/Chicken/Netherlands/10012103/2010         | Indoor layer chicken  | 43,000                  | No          | E1              | Friesland                      | 2010-07-19      | EPI_ISL_309802    |
| H8N4-2011      | 1. A/Chicken/Netherlands/11004004/2011         | Outdoor layer chicken | n/a                     | No          | E2              | Utrecht                        | 2011-03-09      | EPI_ISL_309804    |
|                | 2. A/Chicken/Netherlands/11008325/2011         | Outdoor layer chicken | n/a                     | No          | Original        | Gelderland                     | 2011-05-10      | EPI_ISL_309806    |
| H7N7-2011      | 1. A/Chicken/Netherlands/11008327/2011         | Outdoor layer chicken | 9,000                   | Yes         | E2              | Gelderland                     | 2011-05-12      | EPI_ISL_309929    |
|                | 2. A/Chicken/Netherlands/11011392/2011         | Outdoor layer chicken | 47,000                  | Yes         | E2              | Flevoland                      | 2011-06-23      | EPI_ISL_309808    |
|                | 3. A/Turkey/Netherlands/11011530/2011          | Turkey                | 7,000                   | Yes         | E2              | Flevoland                      | 2011-06-25      | EPI_ISL_309823    |
| H10N9-2012     | 1. A/Chicken/Netherlands/12002495-001-005/2012 | Outdoor layer chicken | 22,000                  | No          | E1              | Noord-Brabant                  | 2012-02-06      | EPI_ISL_309809    |
|                | 2. A/Turkey/Netherlands/12004763-001-004/2012  | Turkey                | 4,000                   | No          | E1              | Limburg                        | 2012-03-05      | EPI_ISL_309825    |
|                | 3. A/Turkey/Netherlands/12005615/2012          | Turkey                | 33,000                  | No          | E1              | Limburg                        | 2012-03-13      | EPI_ISL_309826    |
| H7N7-2013      | 1. A/Chicken/Netherlands/13003601/2013         | Outdoor layer chicken | 85,000                  | Yes         | Original        | Gelderland                     | 2013-03-12      | EPI_ISL_309811    |
|                | 2. A/Chicken/Netherlands/13003983/2013         | Outdoor layer chicken | 24,000                  | Yes         | Original        | Flevoland                      | 2013-03-18      | EPI_ISL_309812    |
| H5N3-2013      | 1. A/Chicken/Netherlands/13015884/2013         | Outdoor layer chicken | 10,000                  | Yes         | Original        | Groningen                      | 2013-11-29      | EPI_ISL_309813    |
|                | 2. A/Chicken/Netherlands/13016263-031-035/2013 | Outdoor layer chicken | 12,000                  | Yes         | Original        | Groningen                      | 2013-12-10      | EPI_ISL_309814    |
| H6N2-2014      | 1. A/Duck/Netherlands/14015610/2014            | Duck                  | n/a                     | No          | Original        | Utrecht                        | 2014-11-17      | EPI_ISL_309833    |
|                | 2. A/Chicken/Netherlands/14016059/2014         | Outdoor layer chicken | n/a                     | No          | Original        | Zuid-Holland                   | 2014-11-22      | EPI_ISL_309930    |
|                | 3. A/Duck/Netherlands/14016396/2014            | Duck                  | 12,000                  | No          | Original        | Gelderland                     | 2014-11-25      | EPI_ISL_309835    |
