# Supplementary material for: Genetic analysis identifies potential transmission of low pathogenic avian influenza viruses between poultry farms
Source: PubMed Central journal article supplement (PMC6850361; doi:10.1111/tbed.13199), 2019-04-25
Supplement: TBED-66-1653-s002.pdf [file TBED-66-1653-s002.pdf]

**S2 Table. Identification of potential between-farm transmission cases.** Identification of potential between-farm transmission cases of low pathogenic avian influenza (LPAI) viruses based on serological and virological surveillance data. Potential between-farm transmission cases were defined as two or more poultry farms testing positive for LPAI virus infection of the same hemagglutinin (HA) and neuraminidase (NA) subtype combination within a time interval between two consecutive detections of maximum six months. All samples were collected as part of the national avian influenza (AI) surveillance program in the Netherlands between January 2006 and September 2016.

| Potential case | Collection date first detection | Collection date last detection | Time span (days) | Total no. of infected farms | No. of infected chicken farms | No. of infected turkey farms | No. of infected duck farms | No. of seropositive farms | No. of viropositive farms |
|----------------|---------------------------------|--------------------------------|------------------|-----------------------------|-------------------------------|------------------------------|----------------------------|---------------------------|---------------------------|
| H7N7-2006      | 2006-07-26                      | 2006-08-03                     | 8                | 2                           | 1                             |                              |                            | 2                         |                           |
| H1N5-2007      | 2007-06-01                      | 2007-08-21                     | 81               | 6                           |                               | 6                            |                            | 4                         | 2                         |
| H10N7-2009     | 2009-04-14                      | 2009-04-15                     | 1                | 2                           | 1                             | 1                            |                            |                           | 2                         |
| H8N4-2009      | 2009-08-10                      | 2010-07-06                     | 330              | 6                           | 6                             |                              |                            | 6                         |                           |
| H6N1-2010      | 2010-05-25                      | 2010-07-15                     | 51               | 3                           | 3                             |                              |                            | 1                         | 2                         |
| H7N4-2010      | 2010-05-14                      | 2010-05-18                     | 4                | 2                           | 2                             |                              |                            | 2                         |                           |
| H9N2-2010      | 2010-11-12                      | 2013-03-12                     | 851              | 12                          | 11                            |                              |                            | 12                        |                           |
| H6N8-2011      | 2011-01-19                      | 2011-02-28                     | 40               | 2                           | 2                             |                              |                            | 2                         |                           |
| H7N7-2011      | 2011-02-04                      | 2011-06-26                     | 142              | 4                           | 2                             | 2                            |                            | 1                         | 3                         |
| H8N4-2011      | 2011-03-10                      | 2011-10-06                     | 210              | 9                           | 7                             |                              | 2                          | 7                         | 2                         |
| H1N1-2011      | 2011-05-31                      | 2011-07-12                     | 42               | 2                           | 1                             |                              | 1                          | 2                         |                           |
| H10N9-2012     | 2012-02-07                      | 2012-04-09                     | 62               | 7                           | 2                             | 5                            |                            | 4                         | 3                         |
| H2N3-2012      | 2012-02-20                      | 2012-08-13                     | 175              | 2                           | 2                             |                              |                            | 2                         |                           |
| H6N8-2012      | 2012-03-02                      | 2012-05-28                     | 87               | 4                           | 4                             |                              |                            | 4                         |                           |
| H2N9-2012      | 2012-04-03                      | 2012-09-25                     | 175              | 4                           | 4                             |                              |                            | 4                         |                           |
| H8N4-2012      | 2012-09-20                      | 2013-01-19                     | 121              | 2                           |                               | 2                            |                            | 2                         |                           |
| H11N9-2012     | 2012-12-20                      | 2013-02-05                     | 47               | 3                           | 3                             |                              |                            | 3                         |                           |
| H7N7-2013      | 2013-03-11                      | 2013-06-13                     | 94               | 3                           | 3                             |                              |                            | 1                         | 2                         |
| H6N2-2013      | 2013-05-06                      | 2013-06-20                     | 45               | 2                           | 2                             |                              |                            | 2                         |                           |
| H7N1-2013      | 2013-05-31                      | 2013-06-17                     | 17               | 2                           | 2                             |                              |                            | 2                         |                           |
| H5N2-2013      | 2013-09-09                      | 2014-03-31                     | 203              | 3                           | 2                             |                              | 1                          | 3                         |                           |
| H8N4-2013      | 2013-09-23                      | 2014-09-18                     | 360              | 6                           | 6                             |                              |                            | 6                         |                           |
| H11N9-2013     | 2013-10-14                      | 2013-10-14                     | 0                | 2                           | 2                             |                              |                            | 2                         |                           |

|              |            |            |     |     |     |    |   |     |    |
|--------------|------------|------------|-----|-----|-----|----|---|-----|----|
| H5N3-2013    | 2013-11-28 | 2014-03-31 | 123 | 4   | 4   |    |   | 2   | 2  |
| H6N8-2013    | 2013-11-29 | 2014-04-01 | 123 | 3   | 2   | 1  |   | 3   |    |
| H9N5-2013    | 2013-11-11 | 2014-01-03 | 53  | 3   | 3   |    |   | 3   |    |
| H2N7-2014    | 2014-02-27 | 2014-09-18 | 203 | 3   | 3   |    |   | 3   |    |
| H6N2-2014    | 2014-03-13 | 2015-02-23 | 347 | 7   | 4   | 1  | 2 | 4   | 3  |
| H5N2-2014    | 2014-11-22 | 2015-04-02 | 131 | 2   | 2   |    |   | 2   |    |
| H2N5-2015    | 2015-01-05 | 2015-07-06 | 182 | 3   | 3   |    |   | 3   |    |
| H9N2-2015    | 2015-02-12 | 2016-03-07 | 389 | 8   | 7   |    | 1 | 8   |    |
| H6N2-2015    | 2015-11-12 | 2016-03-28 | 137 | 2   | 2   |    |   | 2   |    |
| H7N7-2015    | 2015-03-10 | 2015-06-22 | 104 | 3   | 3   |    |   | 3   |    |
| H8N4-2015    | 2015-06-23 | 2015-06-25 | 2   | 2   | 2   |    |   | 2   |    |
| H9N7-2016    | 2016-01-14 | 2016-03-07 | 53  | 2   | 1   |    |   | 2   |    |
| <b>Total</b> |            |            |     | 132 | 104 | 18 | 7 | 111 | 21 |
