# Supplementary material for: Genetic analysis identifies potential transmission of low pathogenic avian influenza viruses between poultry farms
Source: PubMed Central journal article supplement (PMC6850361; doi:10.1111/tbed.13199), 2019-04-25
Supplement: TBED-66-1653-s003.pdf [file TBED-66-1653-s003.pdf]

**S3 Table. Spatial clusters within potential between-farm transmission cases.** Total number of farms and number of infected farms located within spatial clusters per poultry type. Spatial cluster analysis was performed for each potential between-farm transmission case separately using the Bernoulli probability model ( $p < 0.05$ ). All samples were collected as part of the national AI surveillance program in the Netherlands between January 2006 and September 2016.

| Potential case | Spatial cluster ( $p < 0.05$ ) † | Cluster radius (km) | Total no. of farms | Total no. of chicken farms | Total no. of turkey farms | Total no. of duck farms | No. of infected farms | No. of infected chicken farms | No. of infected turkey farms | No. of infected duck farms | No. of seropositive farms | No. of viropositive farms |
|----------------|----------------------------------|---------------------|--------------------|----------------------------|---------------------------|-------------------------|-----------------------|-------------------------------|------------------------------|----------------------------|---------------------------|---------------------------|
| H7N7-2006      | A                                | 0.1                 | 3                  | 3                          |                           |                         | 2                     | 2                             |                              |                            | 2                         |                           |
| H1N5-2007      | B                                | 3.0                 | 25                 | 16                         | 9                         |                         | 6                     |                               | 6                            |                            | 4                         | 2                         |
| H10N7-2009     | C                                | 0.3                 | 4                  | 3                          | 1                         |                         | 2                     | 1                             | 1                            |                            |                           | 2                         |
| H6N1-2010      | D                                | 4.4                 | 5                  | 4                          |                           | 1                       | 3                     | 3                             |                              |                            | 1                         | 2                         |
| H7N7-2011      | E                                | 2.7                 | 3                  | 2                          | 1                         |                         | 2                     | 1                             | 1                            |                            |                           | 2                         |
| H8N4-2011      | F                                | 0.9                 | 10                 | 9                          |                           | 1                       | 5                     | 4                             |                              | 1                          | 4                         | 1                         |
| H10N9-2012     | G                                | 5.9                 | 90                 | 75                         | 14                        | 1                       | 7                     | 2                             | 5                            |                            | 4                         | 3                         |
| H6N8-2012      | H                                | 0.5                 | 2                  | 2                          |                           |                         | 2                     | 2                             |                              |                            | 2                         |                           |
| H8N4-2012      | I                                | 2.1                 | 5                  | 3                          | 2                         |                         | 2                     |                               | 2                            |                            | 2                         |                           |
| H9N2-2015      | J                                | 0.8                 | 8                  | 8                          |                           |                         | 3                     | 3                             |                              |                            | 3                         |                           |
| <b>Total</b>   |                                  |                     | 155                | 125                        | 27                        | 3                       | 34                    | 18                            | 15                           | 1                          | 22                        | 12                        |

† The capital letters refer to close-up maps of spatial clusters presented in Fig 1.
