# Supplementary material for: Genetic analysis identifies potential transmission of low pathogenic avian influenza viruses between poultry farms
Source: PubMed Central journal article supplement (PMC6850361; doi:10.1111/tbed.13199), 2019-04-25
Supplement: TBED-66-1653-s004.pdf [file TBED-66-1653-s004.pdf]

**S4 Table. Identification of minority variants.** Minority variant analysis of genetically closely related low pathogenic avian influenza (LPAI) viruses isolated from potential between-farm transmission cases. All nucleotide positions that varied between viruses at consensus level are shown. Minority variants consist of shared minority variants (i.e. minority variants that are present in both viruses) and minority variants at consensus-level variant sites (i.e. minority variants at sites that varied between viruses at consensus level). Minority variants were detected using a minimum frequency of 2.0% and a minimum coverage of 1,000 reads. All viruses were detected as part of the national avian influenza (AI) surveillance program in the Netherlands between January 2006 and September 2016. Detailed information on the virus sequences is provided in S1 Table.

| Potential case | Gene segment † | Nucleotide position |           |           | Virus 1   |           | Virus 2   |           | Virus 3   |           |
|----------------|----------------|---------------------|-----------|-----------|-----------|-----------|-----------|-----------|-----------|-----------|
|                |                |                     | Variant A | Variant B | Variant A | Variant B | Variant A | Variant B | Variant A | Variant B |
| H1N5-2007      | PB2            | 2049                | T         | C         | 100%      | 0%        | 15%       | 85%       |           |           |
|                | PA             | 885                 | A         | C         | 67%       | 33%       | 0%        | 100%      |           |           |
|                | HA             | 523                 | G         | A         | 61%       | 39%       | 0%        | 100%      |           |           |
|                | NS             | 521                 | C         | T         | 65%       | 35%       | 0%        | 100%      |           |           |
| H10N7-2009     | PB2            | 2061                | A         | G         | 100%      | 0%        | 26%       | 74%       |           |           |
|                | PB2            | 2065                | G         | A         | 100%      | 0%        | 0%        | 100%      |           |           |
|                | PB1            | 472                 | G         | A         | 100%      | 0%        | 0%        | 100%      |           |           |
|                | PB1            | 1930                | G         | A         | 100%      | 0%        | 0%        | 100%      |           |           |
|                | PB1            | 2142                | A         | G         | 100%      | 0%        | 0%        | 100%      |           |           |
|                | PA             | 2059                | A         | C         | 100%      | 0%        | 0%        | 100%      |           |           |
|                | HA             | 766                 | C         | T         | 100%      | 0%        | 11%       | 89%       |           |           |
|                | HA             | 1017                | T         | A         | 97%       | 3%        | 97%       | 3%        |           |           |
|                | NP             | 337                 | G         | A         | 100%      | 0%        | 0%        | 100%      |           |           |
|                | NS             | 30                  | G         | A         | 100%      | 0%        | 0%        | 100%      |           |           |
|                | NS             | 284                 | A         | G         | 100%      | 0%        | 0%        | 100%      |           |           |
|                | H6N1-2010      | PB2                 | 646       | C         | A         | 100%      | 0%        | 0%        | 100%      |           |
| PB2            |                | 2187                | G         | A         | 100%      | 0%        | 0%        | 100%      |           |           |
| PB1            |                | 202                 | T         | C         | 100%      | 0%        | 0%        | 100%      |           |           |
| PA             |                | 73                  | A         | G         | 100%      | 0%        | 0%        | 100%      |           |           |
| PA             |                | 1053                | T         | C         | 100%      | 0%        | 0%        | 100%      |           |           |
| PA             |                | 1071                | A         | T         | 100%      | 0%        | 0%        | 100%      |           |           |
| PA             |                | 1133                | T         | G         | 100%      | 0%        | 0%        | 100%      |           |           |
| PA             |                | 1892                | G         | T         | 100%      | 0%        | 0%        | 100%      |           |           |
| NP             |                | 287                 | C         | T         | 100%      | 0%        | 0%        | 100%      |           |           |
| NA             |                | 284                 | C         | T         | 100%      | 0%        | 2%        | 98%       |           |           |
| NA             |                | 444                 | A         | C         | 55%       | 45%       | 0%        | 100%      |           |           |
| NA             |                | 710                 | G         | A         | 57%       | 43%       | 0%        | 100%      |           |           |
| NA             |                | 1297                | G         | A         | 100%      | 0%        | 0%        | 100%      |           |           |
| NS             |                | 214                 | G         | A         | 100%      | 0%        | 4%        | 96%       |           |           |

|            |           |      |     |      |      |      |      |      |      |      |
|------------|-----------|------|-----|------|------|------|------|------|------|------|
| H7N7-2011  | PB2       | 232  | A   | C    | 100% | 0%   | 16%  | 84%  |      |      |
|            | PB2       | 513  | C   | T    | 100% | 0%   | 16%  | 84%  |      |      |
|            | PB2       | 1084 | C   | T    | 100% | 0%   | 16%  | 84%  |      |      |
|            | PB2       | 1359 | C   | T    | 100% | 0%   | 16%  | 84%  |      |      |
|            | PB1       | 1011 | T   | C    | 100% | 0%   | 15%  | 85%  |      |      |
|            | PA        | 497  | T   | C    | 73%  | 27%  | 10%  | 90%  |      |      |
|            | PA        | 1842 | G   | A    | 100% | 0%   | 15%  | 85%  |      |      |
|            | HA        | 445  | G   | A    | 100% | 0%   | 32%  | 68%  |      |      |
|            | HA        | 629  | A   | G    | 72%  | 28%  | 8%   | 92%  |      |      |
|            | HA        | 1238 | C   | A    | 100% | 0%   | 35%  | 65%  |      |      |
|            | NA        | 631  | T   | C    | 100% | 0%   | 12%  | 88%  |      |      |
|            | NA        | 926  | G   | A    | 100% | 0%   | 12%  | 88%  |      |      |
|            | H5N3-2013 | PB2  | 260 | G    | A    | 100% | 0%   | 0%   | 100% |      |
| PB2        |           | 702  | A   | G    | 100% | 0%   | 0%   | 100% |      |      |
| PB2        |           | 741  | A   | C    | 100% | 0%   | 0%   | 100% |      |      |
| PB1        |           | 213  | C   | T    | 100% | 0%   | 0%   | 100% |      |      |
| PB1        |           | 456  | A   | G    | 100% | 0%   | 0%   | 100% |      |      |
| PB1        |           | 578  | A   | G    | 100% | 0%   | 0%   | 100% |      |      |
| PB1        |           | 1158 | C   | T    | 100% | 0%   | 12%  | 88%  |      |      |
| PB1        |           | 1611 | C   | T    | 100% | 0%   | 0%   | 100% |      |      |
| PB1        |           | 1654 | A   | C    | 100% | 0%   | 0%   | 100% |      |      |
| PB1        |           | 1869 | T   | C    | 100% | 0%   | 0%   | 100% |      |      |
| PA         |           | 294  | T   | C    | 100% | 0%   | 0%   | 100% |      |      |
| PA         |           | 1158 | G   | T    | 100% | 0%   | 0%   | 100% |      |      |
| HA         |           | 460  | T   | -    | 100% | 0%   | 0%   | 100% |      |      |
| HA         |           | 461  | A   | -    | 100% | 0%   | 0%   | 100% |      |      |
| HA         |           | 462  | T   | -    | 100% | 0%   | 0%   | 100% |      |      |
| HA         |           | 464  | A   | T    | 100% | 0%   | 0%   | 100% |      |      |
| HA         |           | 606  | A   | G    | 100% | 0%   | 0%   | 100% |      |      |
| HA         |           | 617  | A   | T    | 100% | 0%   | 0%   | 100% |      |      |
| HA         |           | 859  | G   | A    | 100% | 0%   | 0%   | 100% |      |      |
| HA         |           | 1077 | C   | T    | 100% | 0%   | 0%   | 100% |      |      |
| NP         |           | 249  | A   | G    | 100% | 0%   | 0%   | 100% |      |      |
| NP         | 260       | A    | G   | 100% | 0%   | 0%   | 100% |      |      |      |
| NA         | 1143      | A    | G   | 100% | 0%   | 0%   | 100% |      |      |      |
| MP         | 932       | T    | G   | 95%  | 5%   | 0%   | 100% |      |      |      |
| H10N9-2012 | PB2       | 590  | A   | C    | 100% | 0%   | 32%  | 68%  | 100% | 0%   |
|            | PB2       | 1048 | C   | T    | 100% | 0%   | 32%  | 68%  | 100% | 0%   |
|            | PB2       | 1960 | G   | A    | 100% | 0%   | 0%   | 100% | 3%   | 97%  |
|            | PB2       | 2300 | T   | G    | 100% | 0%   | 0%   | 100% | 0%   | 100% |
|            | PB1       | 318  | C   | A    | 100% | 0%   | 100% | 0%   | 4%   | 96%  |
|            | PB1       | 1383 | G   | A    | 100% | 0%   | 0%   | 100% | 7%   | 93%  |

|           |     |      |   |   |      |     |      |      |      |      |
|-----------|-----|------|---|---|------|-----|------|------|------|------|
|           | PB1 | 1908 | C | T | 100% | 0%  | 0%   | 100% | 6%   | 94%  |
|           | PB1 | 2218 | A | G | 100% | 0%  | 0%   | 100% | 0%   | 100% |
|           | PA  | 392  | T | C | 100% | 0%  | 0%   | 100% | 3%   | 97%  |
|           | PA  | 666  | T | C | 100% | 0%  | 32%  | 68%  | 100% | 0%   |
|           | PA  | 1284 | A | G | 100% | 0%  | 0%   | 100% | 6%   | 94%  |
|           | PA  | 1355 | C | T | 100% | 0%  | 100% | 0%   | 6%   | 94%  |
|           | PA  | 1524 | C | T | 100% | 0%  | 0%   | 100% | 6%   | 94%  |
|           | PA  | 1864 | A | G | 100% | 0%  | 0%   | 100% | 3%   | 97%  |
|           | HA  | 49   | G | A | 100% | 0%  | 100% | 0%   | 0%   | 100% |
|           | HA  | 544  | A | G | 100% | 0%  | 30%  | 70%  | 100% | 0%   |
|           | HA  | 566  | C | A | 100% | 0%  | 0%   | 100% | 0%   | 100% |
|           | HA  | 769  | T | C | 100% | 0%  | 0%   | 100% | 0%   | 100% |
|           | HA  | 1379 | T | C | 100% | 0%  | 0%   | 100% | 0%   | 100% |
|           | NP  | 681  | G | A | 100% | 0%  | 0%   | 100% | 3%   | 97%  |
|           | NP  | 939  | T | C | 100% | 0%  | 0%   | 100% | 3%   | 97%  |
|           | NP  | 951  | G | A | 100% | 0%  | 0%   | 100% | 3%   | 97%  |
|           | NP  | 1090 | A | G | 100% | 0%  | 0%   | 100% | 0%   | 100% |
|           | NP  | 1202 | C | G | 100% | 0%  | 93%  | 7%   | 90%  | 10%  |
|           | NA  | 45   | T | C | 100% | 0%  | 0%   | 100% | 0%   | 100% |
|           | NA  | 48   | T | C | 100% | 0%  | 0%   | 100% | 0%   | 100% |
|           | NA  | 1054 | G | A | 100% | 0%  | 100% | 0%   | 0%   | 100% |
|           | MP  | 421  | A | G | 100% | 0%  | 0%   | 100% | 0%   | 100% |
|           | NS  | 209  | A | G | 100% | 0%  | 0%   | 100% | 0%   | 100% |
|           | NS  | 338  | G | A | 100% | 0%  | 0%   | 100% | 0%   | 100% |
| H6N2-2014 | PB2 | 1785 | A | C | 79%  | 21% | 0%   | 100% | 0%   | 100% |
|           | PB1 | 239  | G | A | 64%  | 36% | 0%   | 100% | 0%   | 100% |
|           | PB1 | 239  | G | A | 64%  | 36% | 0%   | 100% | 0%   | 100% |
|           | PB1 | 354  | T | C | 100% | 0%  | 0%   | 100% | 0%   | 100% |
|           | PB1 | 1833 | G | A | 78%  | 22% | 0%   | 100% | 0%   | 100% |
|           | PB1 | 1836 | G | A | 100% | 0%  | 0%   | 100% | 0%   | 100% |
|           | PA  | 318  | A | G | 100% | 0%  | 100% | 0%   | 0%   | 100% |
|           | HA  | 236  | A | G | 100% | 0%  | 100% | 0%   | 0%   | 100% |
|           | HA  | 376  | G | T | 100% | 0%  | 0%   | 100% | 100% | 0%   |
|           | NP  | 46   | A | G | 53%  | 47% | 0%   | 100% | 0%   | 100% |
|           | NA  | 45   | T | C | 100% | 0%  | 100% | 0%   | 0%   | 100% |
|           | NA  | 558  | A | G | 100% | 0%  | 0%   | 100% | 100% | 0%   |
|           | MP  | 604  | A | G | 100% | 0%  | 0%   | 100% | 0%   | 100% |
|           | NS  | 430  | A | G | 100% | 0%  | 100% | 0%   | 0%   | 100% |

† PB2, polymerase basic protein 2; PB1, polymerase basic protein 1; PA, polymerase acidic protein; NP, nucleoprotein; HA, hemagglutinin; NP, nucleoprotein; NA, neuraminidase; MP, matrix protein; NS, nonstructural protein.
